# Supplementary material for: Production of furfural and carboxylic acids from waste aqueous hemicellulose solutions from the pulp and paper and cellulosic ethanol industries
Source: Royal Society of Chemistry journal article supplement (doi:10.1039/c1ee01022k), 2011-01-01
Supplement: c1ee01022k.pdf [file c1ee01022k.pdf]

Electronic Supplemental Information (ESI) for  
Production of Furfural and Carboxylic Acids from Waste  
Aqueous Hemicellulose Solutions from the Pulp and Paper and  
Cellulosic Ethanol Industries

Rong Xing, Wei Qi and George W. Huber\*

DOI: 10.1039/c1ee01022k

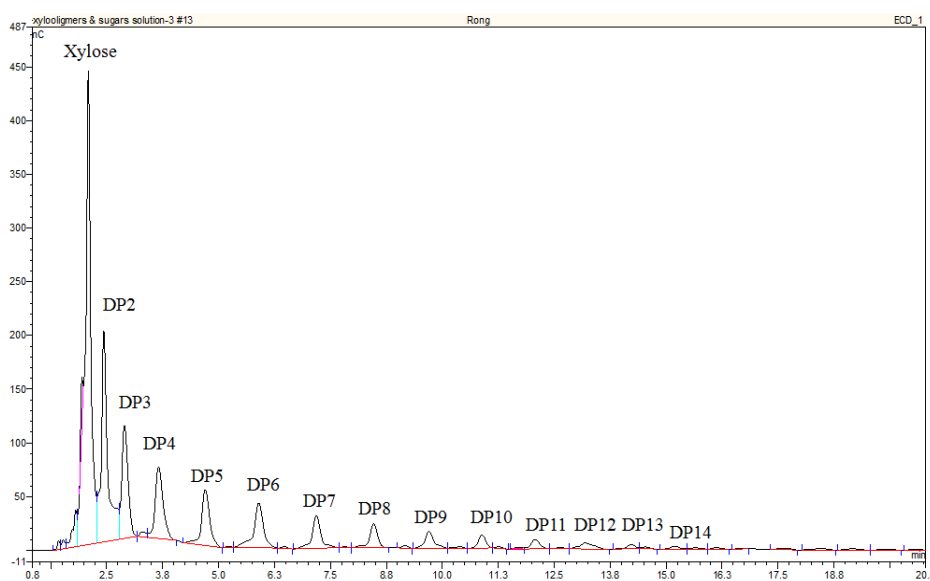

Fig. S1 Dionex IC Chromatogram for the un-hydrolyzed hot water extract showing degree of polymerization range from 1 to 14. Note: Dionex IC can only detect low degree of polymerization (DP), not good for high DPs due to the limited solubility of high DPs and the low response of Dionex IC to high DPs.
